# Supplementary material for: Evolutionary and structural analyses of alpha-papillomavirus capsid proteins yields novel insights into L2 structure and interaction with L1
Source: PubMed Central journal article supplement (PMC2630942; doi:10.1186/1743-422x-5-150), 2008-12-17
Supplement: 1743-422X-5-150-S1.pdf [file 1743-422X-5-150-S1.pdf]

# CLUSTAL 2.0.5 MULTIPLE SEQUENCE ALIGNMENT

File: /Users/johnlowe/Desktop/L1protein.ps  
Page 1 of 5

Date: Fri May 2 11:55:30 2008

```

                                     : **  .  : : *
[HPV7]                               -----MMLNENQVLLPPTPVATIV-SDEVVORSLYXHAGS 38
[HPV-7]                               -----MMLNENQVLLPPTPVATIV-SDEVVORSLYXHAGS 38
[HPV40]                               -----MMLNENQVLLPPTPVATIV-SDEVVORSLYXHAGS 38
[HPV43]                               -----MMLNENQVLLPPTPVATIV-SDEVVORSLYXHAGS 38
[HPV91]                               -----MMLNENQVLLPPTPVATIV-SDEVVORSLYXHAGS 38
[HPV6b]                               -----MMLNENQVLLPPTPVATIV-SDEVVORSLYXHAGS 38
[HPV6bNP_040304.1]                   -----MMLNENQVLLPPTPVATIV-SDEVVORSLYXHAGS 38
[HPV11]                               -----MMLNENQVLLPPTPVATIV-SDEVVORSLYXHAGS 38
[HPV13]                               -----MMLNENQVLLPPTPVATIV-SDEVVORSLYXHAGS 38
[PCP]                               -----MMLNENQVLLPPTPVATIV-SDEVVORSLYXHAGS 38
[CCP]                               -----MMLNENQVLLPPTPVATIV-SDEVVORSLYXHAGS 38
[HPV74]                               -----MMLNENQVLLPPTPVATIV-SDEVVORSLYXHAGS 38
[HPV44]                               -----MMLNENQVLLPPTPVATIV-SDEVVORSLYXHAGS 38
[hpv55]                               -----MMLNENQVLLPPTPVATIV-SDEVVORSLYXHAGS 38
HPV34_L1aa                           -----MMLNENQVLLPPTPVATIV-SDEVVORSLYXHAGS 38
[HPV34NP_041812.1]                   -----MMLNENQVLLPPTPVATIV-SDEVVORSLYXHAGS 38
[HPV34CAAS2560.1]                   -----MMLNENQVLLPPTPVATIV-SDEVVORSLYXHAGS 38
HPV73CAAG3887.1                      -----MMLNENQVLLPPTPVATIV-SDEVVORSLYXHAGS 38
[HPV54]                               -----MMLNENQVLLPPTPVATIV-SDEVVORSLYXHAGS 38
[HPV32]                               -----MMLNENQVLLPPTPVATIV-SDEVVORSLYXHAGS 38
[HPV32CAA52554.1]                   -----MMLNENQVLLPPTPVATIV-SDEVVORSLYXHAGS 38
HPV42                                 -----MMLNENQVLLPPTPVATIV-SDEVVORSLYXHAGS 38
RhesusPV1                             -----MMLNENQVLLPPTPVATIV-SDEVVORSLYXHAGS 38
HPV52_L1aa                           -----MMLNENQVLLPPTPVATIV-SDEVVORSLYXHAGS 38
HPV67_L1aa                           -----MMLNENQVLLPPTPVATIV-SDEVVORSLYXHAGS 38
HPV33_L1aa                           -----MMLNENQVLLPPTPVATIV-SDEVVORSLYXHAGS 38
HPV58_L1aa                           -----MMLNENQVLLPPTPVATIV-SDEVVORSLYXHAGS 38
HPV35                                 -----MMLNENQVLLPPTPVATIV-SDEVVORSLYXHAGS 38
HPV31_L1aa                           -----MMLNENQVLLPPTPVATIV-SDEVVORSLYXHAGS 38
HPV16NP_041332.1                    -----MMLNENQVLLPPTPVATIV-SDEVVORSLYXHAGS 38
HPV16_L1aa                           -----MMLNENQVLLPPTPVATIV-SDEVVORSLYXHAGS 38
[HPV16aaAF534061]                   -----MMLNENQVLLPPTPVATIV-SDEVVORSLYXHAGS 38
[HPV16gerAAQ10719.1]                -----MMLNENQVLLPPTPVATIV-SDEVVORSLYXHAGS 38
[HPV16af2]                           -----MMLNENQVLLPPTPVATIV-SDEVVORSLYXHAGS 38
[HPV16asamaP402678]                 -----MMLNENQVLLPPTPVATIV-SDEVVORSLYXHAGS 38
[HPV16aa]                             -----MMLNENQVLLPPTPVATIV-SDEVVORSLYXHAGS 38
[HPV16af1]                           -----MMLNENQVLLPPTPVATIV-SDEVVORSLYXHAGS 38
HPV51                                 -----MMLNENQVLLPPTPVATIV-SDEVVORSLYXHAGS 38
[HPV52]                               -----MMLNENQVLLPPTPVATIV-SDEVVORSLYXHAGS 38
HPV26NP_041787.1                    -----MMLNENQVLLPPTPVATIV-SDEVVORSLYXHAGS 38
HPV26bCAAS2535.1                   -----MMLNENQVLLPPTPVATIV-SDEVVORSLYXHAGS 38
[HPV69]                               -----MMLNENQVLLPPTPVATIV-SDEVVORSLYXHAGS 38
HPV18_X05015                         -----MMLNENQVLLPPTPVATIV-SDEVVORSLYXHAGS 38
HPV18_NC001357                      -----MMLNENQVLLPPTPVATIV-SDEVVORSLYXHAGS 38
HPV45_L1aa                           -----MMLNENQVLLPPTPVATIV-SDEVVORSLYXHAGS 38
HPV59_L1aa                           -----MMLNENQVLLPPTPVATIV-SDEVVORSLYXHAGS 38
HPVcand85_L1aa                      -----MMLNENQVLLPPTPVATIV-SDEVVORSLYXHAGS 38
HPV68_L1aa                           -----MMLNENQVLLPPTPVATIV-SDEVVORSLYXHAGS 38
HPV39_L1aa                           -----MMLNENQVLLPPTPVATIV-SDEVVORSLYXHAGS 38
HPV70_L1aa                           -----MMLNENQVLLPPTPVATIV-SDEVVORSLYXHAGS 38
HPV29                                 -----MMLNENQVLLPPTPVATIV-SDEVVORSLYXHAGS 38
[HPV77]                               -----MMLNENQVLLPPTPVATIV-SDEVVORSLYXHAGS 38
[HPV94]                               -----MMLNENQVLLPPTPVATIV-SDEVVORSLYXHAGS 38
[HPV10NP041746.1]                   -----MMLNENQVLLPPTPVATIV-SDEVVORSLYXHAGS 38
[HPV10CAAS2494.1]                   -----MMLNENQVLLPPTPVATIV-SDEVVORSLYXHAGS 38
[HPV-10CAAS2495.1]                 -----MMLNENQVLLPPTPVATIV-SDEVVORSLYXHAGS 38
[HPV3]                               -----MMLNENQVLLPPTPVATIV-SDEVVORSLYXHAGS 38
HPV28                                 -----MMLNENQVLLPPTPVATIV-SDEVVORSLYXHAGS 38
HPV56CAAS2600.1                     -----MMLNENQVLLPPTPVATIV-SDEVVORSLYXHAGS 38
HPV66                                 -----MMLNENQVLLPPTPVATIV-SDEVVORSLYXHAGS 38
[HPV53]                               -----MMLNENQVLLPPTPVATIV-SDEVVORSLYXHAGS 38
[HPV53CAAS2595.1]                   -----MMLNENQVLLPPTPVATIV-SDEVVORSLYXHAGS 38
[HPV30]                               -----MMLNENQVLLPPTPVATIV-SDEVVORSLYXHAGS 38
[HPV71]                               -----MMLNENQVLLPPTPVATIV-SDEVVORSLYXHAGS 38
[HPV81]                               -----MMLNENQVLLPPTPVATIV-SDEVVORSLYXHAGS 38
[HPV61]                               -----MMLNENQVLLPPTPVATIV-SDEVVORSLYXHAGS 38
[HPV72]                               -----MMLNENQVLLPPTPVATIV-SDEVVORSLYXHAGS 38
[HPV84]                               -----MMLNENQVLLPPTPVATIV-SDEVVORSLYXHAGS 38
[HPV86]                               -----MMLNENQVLLPPTPVATIV-SDEVVORSLYXHAGS 38
[HPVcand87]                          -----MMLNENQVLLPPTPVATIV-SDEVVORSLYXHAGS 38
HPV83AAD38974.1|AF151983_7          -----MMLNENQVLLPPTPVATIV-SDEVVORSLYXHAGS 38
[HPVcand89]                          -----MMLNENQVLLPPTPVATIV-SDEVVORSLYXHAGS 38
[HPV90]                               -----MMLNENQVLLPPTPVATIV-SDEVVORSLYXHAGS 38
[HPV57]                               -----MMLNENQVLLPPTPVATIV-SDEVVORSLYXHAGS 38
[HPV-2]                               -----MMLNENQVLLPPTPVATIV-SDEVVORSLYXHAGS 38
[HPV27]                               -----MMLNENQVLLPPTPVATIV-SDEVVORSLYXHAGS 38
1.....10.....20.....30.....40.....50.....60.....70.....80.....90.....100.....110.....120.....130.....140.....150

```

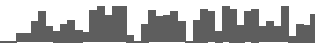



CLUSTAL 2.0.5 MULTIPLE SEQUENCE ALIGNMENT

File: /Users/johnlow/Desktop/L1protein.pst
Page 3 of 5

Date: Fri May 2 11:55:30 2008

Multiple sequence alignment output showing protein sequences from various sources (e.g., [HPV7], [HPV-7], [HPV40], [HPV43], [HPV51], [HPV6b]...) aligned in columns. The alignment is displayed in a standard CLUSTAL format with gaps represented by dashes. A scale bar at the bottom indicates sequence positions from 310 to 450.



# CLUSTAL 2.0.5 MULTIPLE SEQUENCE ALIGNMENT

File: /Users/johnlowe/Desktop/L1protein.ps  
Page 5 of 5

Date: Fri May 2 11:55:30 2008

```

::*
!
[HPV7] LMQAG--LRTPGPKFKSRKRPAPTSSSSSGSVTPKRR---KTKR-- 505
[HPV-7] LMQAG--LRTPGPKFKSRKRPAPTSSSSSGSVTPKRR---KTKR-- 505
[HPV40] LMQAG--VRAGPRFKSRKRPAPTSSSSSGKVPKRR---KTKR-- 505
[HPV43] VMQAG--LRPKFKLTKVRSKAPSSSSGAPAS--SKRR---KTKR-- 531
[HPV91] VMQAG--LRPKFKLTKVRSKAPSSSSGAPAS--KRR---KTKR-- 469
[HPV6b] LLSG--YRGRSSIRGVRRPAVKAAAP--KRRRA---KTKR-- 500
[HPV6bNP_040304.1] LLSG--YRGRSSIRGVRRPAVKAAAP--KRRRA---KTKR-- 500
[HPV11] LLSG--YRGRSSIRGVRRPAVKAAAP--KRRRA---KTKR-- 501
[HPV13] LLTG--VQSSIVRGRKRAAETSATPT---TRK---KAKR-- 499
[PCP] LLTG--VQTSFARAGTKRAAETSATPT---TRK---RVKRR-- 502
[CCP] LLTG--VQSTSLARAGTKRAAETSATPT---TRK---KVKRR-- 501
[HPV74] LLDG--VQARSVVRGRKRAAETSATPT---KRR---RSRR-- 527
[HPV44] LLDG--VQARSVVRGRKRAAETSATPT---KRR---RSRR-- 500
[hpv55] LLDG--VQARSVVRGRKRAAETSATPT---KRR---RSRR-- 501
HPV34_L1aa LLDG--MRARPLQASKRSAPSSSSGAP---KRR---RAKRI-- 528
[HPV34CAAS2560.1] LLDG--MRARPLQASKRSAPSSSSGAP---KRR---RAKRI-- 528
[HPV34CAAS2560.1] LLDG--MRARPLQASKRSAPSSSSGAP---KRR---RAKRI-- 528
[HPV73CAAG3887.1] LLDG--MRARPLQASKRSAPSSSSGAP---KRR---RAKRI-- 503
[HPV54] LLDG--LRARPLRFPVKRAAPSSSSGAP---KRR---KTKR-- 497
[HPV32] LLDG--LRARPLRFPVKRAAPSSSSGAP---KRR---KTKR-- 503
[HPV32CAAS2554.1] LLDG--LRARPLRFPVKRAAPSSSSGAP---KRR---KTKR-- 503
HPV42 LLDG--LRARPLRFPVKRAAPSSSSGAP---KRR---KTKR-- 502
RhesusPV1 LLDG--MRARPLRFPVKRAAPSSSSGAP---KRR---KTKR-- 501
HPV52_L1aa LLDG--LRARPLRFPVKRAAPSSSSGAP---KRR---KTKR-- 529
HPV67_L1aa LLDG--LRARPLRFPVKRAAPSSSSGAP---KRR---KTKR-- 529
HPV73_L1aa LLDG--LRARPLRFPVKRAAPSSSSGAP---KRR---KTKR-- 499
HPV58_L1aa LLDG--LRARPLRFPVKRAAPSSSSGAP---KRR---KTKR-- 524
HPV35 LLDG--LRARPLRFPVKRAAPSSSSGAP---KRR---KTKR-- 505
HPV31_L1aa LLDG--LRARPLRFPVKRAAPSSSSGAP---KRR---KTKR-- 504
HPV16NP_041332.1 LLDG--LRARPLRFPVKRAAPSSSSGAP---KRR---KTKR-- 531
HPV16_L1aa LLDG--LRARPLRFPVKRAAPSSSSGAP---KRR---KTKR-- 531
[HPV16aaAF534061] LLDG--LRARPLRFPVKRAAPSSSSGAP---KRR---KTKR-- 531
[HPV16aaAF534061] LLDG--LRARPLRFPVKRAAPSSSSGAP---KRR---KTKR-- 531
[HPV16af2] LLDG--LRARPLRFPVKRAAPSSSSGAP---KRR---KTKR-- 531
[HPV16aaMaF042678] LLDG--LRARPLRFPVKRAAPSSSSGAP---KRR---KTKR-- 531
[HPV16aa] LLDG--LRARPLRFPVKRAAPSSSSGAP---KRR---KTKR-- 531
[HPV16af1] LLDG--LRARPLRFPVKRAAPSSSSGAP---KRR---KTKR-- 531
HPV51 LLDG--LRARPLRFPVKRAAPSSSSGAP---KRR---KTKR-- 504
[HPV52] LLDG--LRARPLRFPVKRAAPSSSSGAP---KRR---KTKR-- 503
HPV26NP_041787.1 LLDG--LRARPLRFPVKRAAPSSSSGAP---KRR---KTKR-- 503
HPV26CAAS2535.1 LLDG--LRARPLRFPVKRAAPSSSSGAP---KRR---KTKR-- 503
[HPV69] LLDG--LRARPLRFPVKRAAPSSSSGAP---KRR---KTKR-- 507
HPV18_X05015 LLDG--LRARPLRFPVKRAAPSSSSGAP---KRR---KTKR-- 568
HPV18_MCO01357 LLDG--LRARPLRFPVKRAAPSSSSGAP---KRR---KTKR-- 568
HPV45_L1aa LLDG--LRARPLRFPVKRAAPSSSSGAP---KRR---KTKR-- 539
HPV59_L1aa LLDG--LRARPLRFPVKRAAPSSSSGAP---KRR---KTKR-- 508
HPVcand85_L1aa LLDG--LRARPLRFPVKRAAPSSSSGAP---KRR---KTKR-- 504
HPV68_L1aa LLDG--LRARPLRFPVKRAAPSSSSGAP---KRR---KTKR-- 505
HPV39_L1aa LLDG--LRARPLRFPVKRAAPSSSSGAP---KRR---KTKR-- 504
HPV70_L1aa LLDG--LRARPLRFPVKRAAPSSSSGAP---KRR---KTKR-- 503
HPV29 LLDG--LRARPLRFPVKRAAPSSSSGAP---KRR---KTKR-- 503
[HPV71] LLDG--LRARPLRFPVKRAAPSSSSGAP---KRR---KTKR-- 503
[HPV94] LLDG--LRARPLRFPVKRAAPSSSSGAP---KRR---KTKR-- 532
[HPV10NP041746.1] LLDG--LRARPLRFPVKRAAPSSSSGAP---KRR---KTKR-- 531
[HPV10CAAS2494.1] LLDG--LRARPLRFPVKRAAPSSSSGAP---KRR---KTKR-- 531
[HPV-10CAAS2495.1] LLDG--LRARPLRFPVKRAAPSSSSGAP---KRR---KTKR-- 503
[HPV3] LLDG--LRARPLRFPVKRAAPSSSSGAP---KRR---KTKR-- 532
HPV28 LLDG--LRARPLRFPVKRAAPSSSSGAP---KRR---KTKR-- 502
HPV56CAAS2600.1 LLDG--LRARPLRFPVKRAAPSSSSGAP---KRR---KTKR-- 534
HPV66 LLDGPRPPPKASVSAKRRAPSSSSGAP---KRR---KTKR-- 503
[HPV53] LLDG--LRARPLRFPVKRAAPSSSSGAP---KRR---KTKR-- 499
HPV53CAAS2595.1 LLDG--LRARPLRFPVKRAAPSSSSGAP---KRR---KTKR-- 499
[HPV30] LLDG--LRARPLRFPVKRAAPSSSSGAP---KRR---KTKR-- 508
[HPV71] LLDG--LRARPLRFPVKRAAPSSSSGAP---KRR---KTKR-- 521
[HPV81] LLDG--LRARPLRFPVKRAAPSSSSGAP---KRR---KTKR-- 532
[HPV61] LLDG--LRARPLRFPVKRAAPSSSSGAP---KRR---KTKR-- 505
[HPV72] LLDG--LRARPLRFPVKRAAPSSSSGAP---KRR---KTKR-- 534
[HPV84] LLDG--LRARPLRFPVKRAAPSSSSGAP---KRR---KTKR-- 503
[HPV86] LLDG--LRARPLRFPVKRAAPSSSSGAP---KRR---KTKR-- 505
HPVcand87 LLDG--LRARPLRFPVKRAAPSSSSGAP---KRR---KTKR-- 504
HPV83AAD38974.1|AF151983_7 LLDG--LRARPLRFPVKRAAPSSSSGAP---KRR---KTKR-- 503
[HPVcand89] LLDG--LRARPLRFPVKRAAPSSSSGAP---KRR---KTKR-- 518
[HPV90] LLDG--LRARPLRFPVKRAAPSSSSGAP---KRR---KTKR-- 505
[HPV57] LLDG--LRARPLRFPVKRAAPSSSSGAP---KRR---KTKR-- 510
HPV-2 LLDG--LRARPLRFPVKRAAPSSSSGAP---KRR---KTKR-- 510
[HPV27] LLDG--LRARPLRFPVKRAAPSSSSGAP---KRR---KTKR-- 594
.....610.....620.....630.....640.....

```

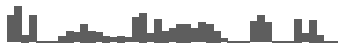











|       |     |                                                    |     |
|-------|-----|----------------------------------------------------|-----|
| HPV16 | 1   | MRHKRSKRTRKASATQLYKTCKQAGTCPPDIIPKVEGKTIAEQILQYGS  | 50  |
|       |     | .....   .: ...                                     |     |
| bpv1  | 1   | PAIVTPDAVPADSG-----                                | 14  |
| HPV16 | 51  | MGVFFGGLGIGTGSGTGGRTGYIPLGTRPPTATDTLAPVRPPLTVDPVGP | 100 |
|       |     | ... .   .  : : ...: : .                            |     |
| bpv1  | 15  | ----LDALSIGTDS-----STETLITL-----LEPEGP             | 38  |
| HPV16 | 101 | SDPSIVSLVEETSFDAGAPTSVPSIPPDVSGFSITTSDDTTPAILDINN  | 150 |
|       |     | . .:.:. .  ... : .:                                |     |
| bpv1  | 39  | EDIAVLEL-----QPLDRPT-----WQVSN                     | 58  |
| HPV16 | 151 | TVTTVTTHNNPTFTDPSVLQPPTPAETGG--HFTLSSSTISTHNYEIPM  | 198 |
|       |     | .   .:.:.:. ..   .:.   .  :.:.:. .:.:. . .:.:      |     |
| bpv1  | 59  | AV----HQSSAYHAPLQLQ-SSIAETSGLLENIFVGGSGLDGTGGENIEL | 102 |
| HPV16 | 199 | DTFIVSTNPNTVTSSTPIGSRPVARLGLYSRTTQQVKVVDPAFVTPTK   | 248 |
|       |     | ..  .: .                                           |     |
| bpv1  | 103 | TYF---GSPRT---STP                                  | 113 |
